# Supplementary material for: Acceptance of the Use of Artificial Intelligence in Medicine Among Japan’s Doctors and the Public: A Questionnaire Survey
Source: PubMed Central journal article supplement (PMC8968553; doi:10.2196/24680), 2022-03-16
Supplement: humanfactors_v9i1e24680_app1.pdf [file humanfactors_v9i1e24680_app1.pdf]

## Checklist for Reporting Results of Internet E-Surveys

| Item category                                                          | Checklist item         | Report in the present study                                                                                                                                                                                                                                                                                                                                                              |
|------------------------------------------------------------------------|------------------------|------------------------------------------------------------------------------------------------------------------------------------------------------------------------------------------------------------------------------------------------------------------------------------------------------------------------------------------------------------------------------------------|
| Design                                                                 | Describe survey design | The target population consisted of the public and doctors in Japan. The numbers of sample were 600 members of the public and 400 doctors who registered with Rakuten Insight. The public was divided into six classes of 10 years each, with 50 men and 50 women in each class. The sample representing doctors consisted of 350 men and 50 women aged 25 years or older.                |
| IRB (Institutional Review Board) approval and informed consent process | IRB approval           | The authors did not obtained Institutional Review Board approval for this study because we did not obtain any personal or health-related information from the respondents.                                                                                                                                                                                                               |
|                                                                        | Informed consent       | Respondents were told length of time to answer the questions, the purpose of the survey, and who conducted the survey on the screen just before they started to answer. Respondents were allowed to stop answering at any time until they answered all the questions. We took the completed responses as agreement of the survey by the respondents and used the responses for analysis. |

| Item category                                                                        | Checklist item                   | Report in the present study                                                                                                                                                                                                                                                   |
|--------------------------------------------------------------------------------------|----------------------------------|-------------------------------------------------------------------------------------------------------------------------------------------------------------------------------------------------------------------------------------------------------------------------------|
|                                                                                      | Data protection                  | We collected no personal information in the present study.                                                                                                                                                                                                                    |
| Recruitment process and description of the sample having access to the questionnaire | Open survey versus closed survey | We conducted a closed survey of Rakuten Insight registrants.                                                                                                                                                                                                                  |
|                                                                                      | Contact mode                     | We did not contact with the potential respondents because we used Rakuten Insight, an internet survey service provider. They made initial contact with the respondents on the Internet.                                                                                       |
|                                                                                      | Advertising the survey           | The survey notice was displayed on the survey panel's registrant website. The title of the questionnaire was "Survey on 'Medicine Using Artificial Intelligence'".                                                                                                            |
| Survey administration                                                                | Web/E-mail                       | The survey was posted on the website.                                                                                                                                                                                                                                         |
|                                                                                      | Context                          | The website was visited by survey panel registrants to answer surveys. Because participation in the online survey was limited to individuals who could use a personal computer, smartphone, or similar device, the sample may have been biased toward the digitally literate. |

| Item category                            | Checklist item | Report in the present study                                                                                                                              |
|------------------------------------------|----------------|----------------------------------------------------------------------------------------------------------------------------------------------------------|
| Mandatory/voluntary                      |                | This was a voluntary survey.                                                                                                                             |
| Incentives                               |                | Respondents earned points in the survey site.                                                                                                            |
| Time/Date                                |                | The survey was conducted over three days, from November 13 to 15, 2018.                                                                                  |
| Randomization of items or questionnaires |                | 20 items representing a factor of acceptance was displayed randomly. Then, items on the respondents' general attributes were displayed in a fixed order. |
| Adaptive questioning                     |                | We did not use adaptive questioning.                                                                                                                     |
| Number of Items                          |                | The number of items per page ranged from one to seven.                                                                                                   |
| Number of screens                        |                | The number of page was seventeen.                                                                                                                        |

| Item category  | Checklist item      | Report in the present study                                                                                                                                                                                                                                                                                                                         |
|----------------|---------------------|-----------------------------------------------------------------------------------------------------------------------------------------------------------------------------------------------------------------------------------------------------------------------------------------------------------------------------------------------------|
|                | Completeness check  | In the items representing a factor of acceptance, there were not only positive and negative options, but also an intermediate "cannot say either way" option, so that the participants had to choose one. In addition, a system was used where the user could not proceed to the next screen unless all the questions were answered on each screen. |
|                | Review step         | In order to avoid the influence of subsequent questions, once a respondent answered a question, they could not change their answer.                                                                                                                                                                                                                 |
| Response rates | Unique site visitor | Since we used an internet survey service, it was difficult to calculate the exact response rate, so we used the sample-wide responses instead.                                                                                                                                                                                                      |
|                | View rate           |                                                                                                                                                                                                                                                                                                                                                     |
|                | Participation rate  |                                                                                                                                                                                                                                                                                                                                                     |
|                | Completion rate     |                                                                                                                                                                                                                                                                                                                                                     |

| Item category                                        | Checklist item                                      | Report in the present study                                                                                                        |
|------------------------------------------------------|-----------------------------------------------------|------------------------------------------------------------------------------------------------------------------------------------|
| Preventing multiple entries from the same individual | Registration                                        | The questionnaire was displayed only once per registered survey panel member to prevent multiple entries from the same individual. |
| Analysis                                             | Handling of incomplete questionnaires               | We analyzed only completed questionnaires.                                                                                         |
|                                                      | Questionnaires submitted with an atypical timestamp | We did not use timestamp.                                                                                                          |
|                                                      | Statistical correction                              | We did not use methods to adjust for the non-representative sample.                                                                |
